# Supplementary material for: Adhesion and Growth of Neuralized Mouse Embryonic Stem Cells on Parylene-C/SiO2 Substrates
Source: MDPI journal article supplement (doi:10.3390/ma14123174), 2021-06-09
Supplement: s1 [file s1]

Supplementary

# Adhesion and Growth of Neuralised Mouse Embryonic Stem Cells on Parylene-C/SiO<sub>2</sub> Substrates

Alan F. Murray <sup>1</sup> and Evangelos Delivopoulos <sup>2,\*</sup>

<sup>1</sup> School of Engineering, University of Edinburgh, Edinburgh EH9 3JL, UK; Alan.Murray@ed.ac.uk

<sup>2</sup> School of Biological Sciences, University of Reading, Berkshire RG6 6AH, UK

\* Correspondence: e.delivopoulos@reading.ac.uk; Tel.: +44-11-8378-8615

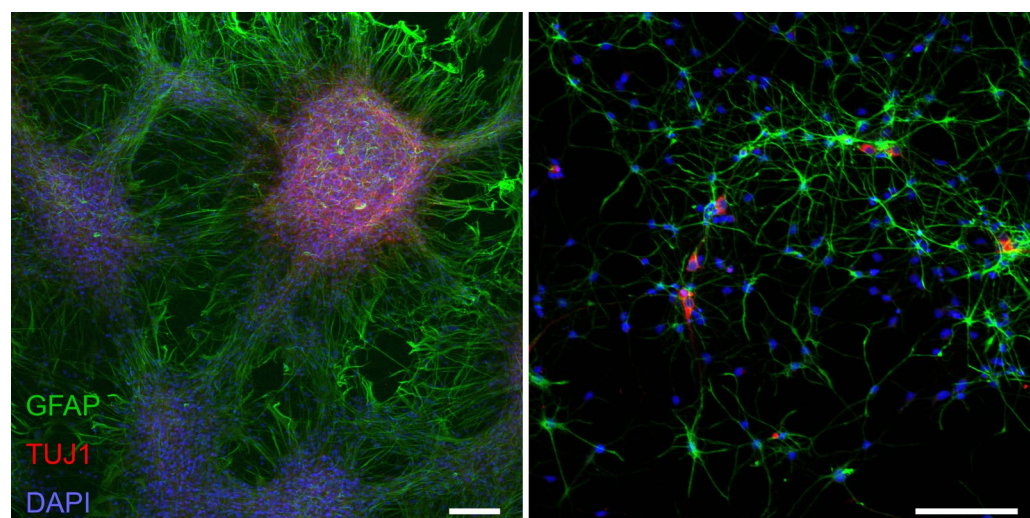

**Figure S1.** Assessment of the morphology and health of primary neuron and astrocyte populations. Primary cell culture examples on poly-D-lysine treated glass coverslips. Neuronal and astrocyte populations appear large and healthy. Neurons formed clusters and extended processes, whereas astrocytes expanded and covered the entire surface. Left image: 21 DIV. Right image: 7 DIV. For both images, the green channel shows GFAP (astrocytes), the red channel shows TUJ1 (neurons) and the blue channel shows DAPI (nuclei). Scale bar is 100  $\mu$ m.
